# Supplementary material for: A multilevel investigation of factors related to achievement in Ireland and Spain using PISA data
Source: Frontiers journal article supplement (doi:10.3389/feduc.2024.1306197), 2024-02-21
Supplement: Table_1.DOCX [file Table_1.DOCX]

**Supplementary material**

Table 1. Variance components of the models.

|  |  |  | NULL | FINAL | PSEUDO |
| --- | --- | --- | --- | --- | --- |
| SPAIN | MATHS | LEVEL 1 | 6731.29256 | 4872.17512 | 27.62% |
| LEVEL 2 | 1017.99298 | 358.29726 | 64.8% |
| READING COMPREHENSION | LEVEL 1 | 7236.92640 | 5421.64134 | 25.08% |
| LEVEL 2 | 1199.15064 | 583.87330 | 81.97% |
| SCIENCE | LEVEL 1 | 6967.47286 | 5347.31467 | 23.25% |
| LEVEL 2 | 895.68801 | 288.94919 | 67.73% |
| IRELAND | MATHS | LEVEL 1 | 5221.94632 | 4655.94517 | 10.84% |
| LEVEL 2 | 1015.93626 | 206.79501 | 79.64% |
| READING COMPREHENSION | LEVEL 1 | 7131.29943 | 6527.70176 | 08.46% |
| LEVEL 2 | 1342.85416 | 242.15733 | 81.97% |
| SCIENCE | LEVEL 1 | 6869.58644 | 6323.00030 | 7.96% |
| LEVEL 2 | 1163.26073 | 290.18505 | 75.05% |
